# Supplementary material for: Quantifying the Impact of Atmospheric Transport Uncertainty on CO2 Surface Flux Estimates
Source: PubMed Central journal article supplement — Global Biogeochem Cycles. 2019 Apr 16;33(4):484–500. doi: 10.1029/2018GB006086 (PMC6582606; doi:10.1029/2018gb006086), 2019-04-16
Supplement: GBC-33-484-s001.pdf [file GBC-33-484-s001.pdf]

# Supporting Information for "Quantifying the Impact of Atmospheric Transport Uncertainty on CO<sub>2</sub> Surface Flux Estimates"

Andrew E. Schuh<sup>1</sup>, Andrew R. Jacobson<sup>2</sup>, Sourish Basu<sup>2</sup>, Brad Weir<sup>3</sup>,

David Baker<sup>1</sup>, Kevin Bowman<sup>4</sup>, Frédéric Chevallier<sup>5</sup>, Sean Crowell<sup>6</sup>, Kenneth

J. Davis<sup>7</sup>, Feng Deng<sup>8</sup>, Scott Denning<sup>9</sup>, Liang Feng<sup>10,11</sup>, Dylan Jones<sup>8</sup>, Junjie

Liu<sup>4</sup>, and Paul I. Palmer<sup>10,11</sup>

<sup>1</sup>Cooperative Institute for Research in the Atmosphere, Colorado State University <sup>2</sup>University of Colorado and NOAA Earth System Research Laboratory <sup>3</sup>Global Modeling and Assimilation Office, NASA Goddard Space Flight Center, Greenbelt, MD 20771, USA <sup>4</sup>Jet Propulsion Laboratory, California Institute of Technology, Pasadena, CA, USA <sup>5</sup>Laboratoire des Sciences du Climat et de l'Environnement, CEACNRSUVSQ, L'Orme des Merisiers, Gif-sur-Yvette, France <sup>6</sup>School of Meteorology, University of Oklahoma, Norman, OK 73072, USA <sup>7</sup>Department of Meteorology and Atmospheric Science, Penn State University, University Park, PA, USA <sup>8</sup>Department of Physics, University of Toronto, Toronto, ON, Canada <sup>9</sup>Department of Atmospheric Sciences, Colorado State University, Fort Collins, CO, USA <sup>10</sup>School of GeoSciences, University of Edinburgh, Edinburgh, UK <sup>11</sup>National Centre for Earth Observation, Edinburgh, UK

## Contents of this file

1. Table 1

2. Figures S1 to S2

**Introduction** This SI contains three items. A table (Table 1) of the stations for which SF6 observations were available for the analysis in the manuscript, along with a figure (Figure S1) showing their locations globally. Additionally, Figure S2 shows the model vertical levels for the two transport models being discussed in the manuscript.

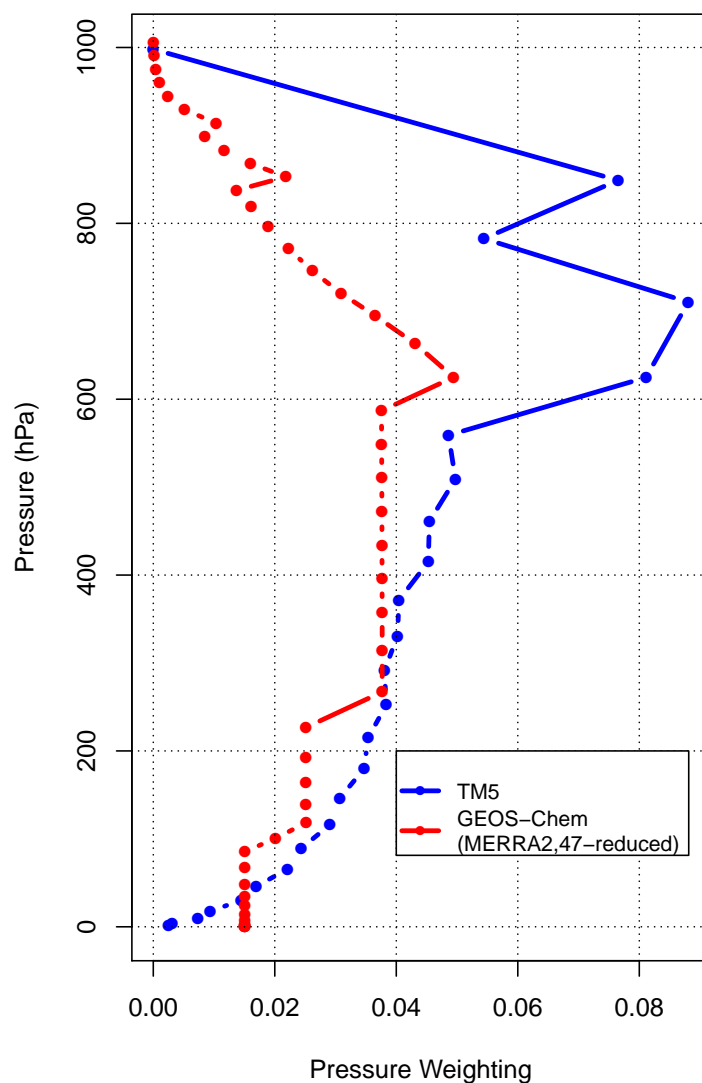

**Figure S1.** Weights as a function model level, i.e. portion of the total column pressure for each model level. This plot shows the formulation for TM5 with 25 levels and GEOS-Chem's MERRA2 reduced 47 level formulation. GEOS-Chem appears to have less total pressure but this is only because the vertical pressure grid has about twice as many levels therefore the relative percentage of the atmosphere in each layer is about half of that of TM5 on average.

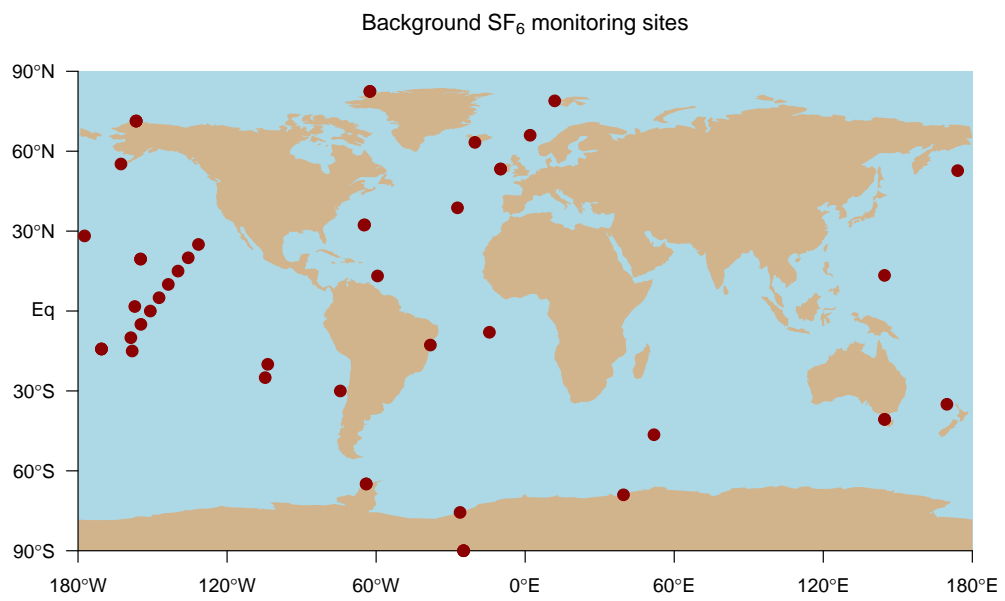

**Figure S2.** Map of SF<sub>6</sub> Marine Boundary Layer (MBL) sites used in SF<sub>6</sub> analysis.

Table S1: List of marine boundary layer sampling sites for SF6

| Site                                   | Latitude | Platform                 | Laboratory |
|----------------------------------------|----------|--------------------------|------------|
| South Pole                             | 89.98°S  | surface flask            | HATS       |
| South Pole                             | 89.98°S  | surface quasi-continuous | HATS       |
| South Pole                             | 89.97°S  | surface flask            | CCGG       |
| Halley Bay, Antarctica                 | 75.61°S  | surface flask            | CCGG       |
| Syowa, Antarctica                      | 69.00°S  | surface flask            | CCGG       |
| Palmer Station, Antarctica             | 64.92°S  | surface flask            | HATS       |
| Palmer Station, Antarctica             | 64.92°S  | surface flask            | CCGG       |
| Crozet Island                          | 46.43°S  | surface flask            | CCGG       |
| Cape Grim, Tasmania                    | 40.68°S  | surface flask            | HATS       |
| Cape Grim, Tasmania                    | 40.68°S  | surface flask            | CCGG       |
| Pacific Ocean                          | 35.00°S  | shipboard flask          | CCGG       |
| Pacific Ocean                          | 30.00°S  | shipboard flask          | CCGG       |
| Pacific Ocean                          | 25.00°S  | shipboard flask          | CCGG       |
| Pacific Ocean                          | 20.00°S  | shipboard flask          | CCGG       |
| Pacific Ocean                          | 15.00°S  | shipboard flask          | CCGG       |
| Tutuila, American Samoa                | 14.25°S  | surface flask            | HATS       |
| Tutuila, American Samoa                | 14.25°S  | surface quasi-continuous | HATS       |
| Tutuila, American Samoa                | 14.24°S  | surface flask            | CCGG       |
| Arembepe, Brazil                       | 12.77°S  | surface flask            | CCGG       |
| Pacific Ocean                          | 10.00°S  | shipboard flask          | CCGG       |
| Ascension Island                       | 7.97°S   | surface flask            | CCGG       |
| Pacific Ocean                          | 5.00°S   | shipboard flask          | CCGG       |
| Pacific Ocean                          | 0.00°N   | shipboard flask          | CCGG       |
| Christmas Island, Republic of Kiribati | 1.70°N   | surface flask            | CCGG       |
| Pacific Ocean                          | 5.00°N   | shipboard flask          | CCGG       |
| Pacific Ocean                          | 10.00°N  | shipboard flask          | CCGG       |
| Ragged Point, Barbados                 | 13.16°N  | surface flask            | CCGG       |
| Mariana Islands, Guam                  | 13.39°N  | surface flask            | CCGG       |
| Pacific Ocean                          | 15.00°N  | shipboard flask          | CCGG       |
| Cape Kumukahi, Hawaii                  | 19.52°N  | surface flask            | CCGG       |
| Cape Kumukahi, Hawaii                  | 19.52°N  | surface flask            | HATS       |
| Pacific Ocean                          | 20.00°N  | shipboard flask          | CCGG       |
| Pacific Ocean                          | 25.00°N  | shipboard flask          | CCGG       |
| Sand Island, Midway                    | 28.21°N  | surface flask            | CCGG       |
| Tudor Hill, Bermuda                    | 32.26°N  | surface flask            | CCGG       |
| St. Davids Head, Bermuda               | 32.37°N  | surface flask            | CCGG       |
| Terceira Island, Azores                | 38.76°N  | surface flask            | CCGG       |
| Shemya Island, Alaska                  | 52.72°N  | surface flask            | CCGG       |
| Mace Head, Ireland                     | 53.32°N  | surface flask            | CCGG       |
| Mace Head, Ireland                     | 53.33°N  | surface flask            | HATS       |
| Cold Bay, Alaska                       | 55.20°N  | surface flask            | CCGG       |

Continued on next page

**Table S1 – continued from previous page**

| <b>Site</b>          | <b>Latitude</b> | <b>Platform</b>          | <b>Laboratory</b> |
|----------------------|-----------------|--------------------------|-------------------|
| Storhofdi, Iceland   | 63.33°N         | surface flask            | CCGG              |
| Ocean Station M      | 66.00°N         | surface flask            | CCGG              |
| Barrow, Alaska       | 71.32°N         | surface flask            | CCGG              |
| Barrow, Alaska       | 71.32°N         | surface flask            | HATS              |
| Barrow, Alaska       | 71.32°N         | surface quasi-continuous | HATS              |
| Ny-Alesund, Svalbard | 78.91°N         | surface flask            | CCGG              |
| Alert, Canada        | 82.45°N         | surface flask            | CCGG              |
| Alert, Canada        | 82.45°N         | surface flask            | HATS              |

Table S1: List of marine boundary layer sampling sites  
for SF<sub>6</sub>
